# Supplementary material for: Polarity adjustment of a nanosilica-functionalized polyamine modified by ionic liquid for removal of Cu2+ from aqueous solutions
Source: Royal Society of Chemistry journal article supplement (doi:10.1039/c5ra20179a), 2016-01-01
Supplement: c5ra20179a1.pdf [file c5ra20179a1.pdf]

**Polarity adjustment of the nanosilica-functionalized  
polyamine modified by ionic liquid for removal of Cu<sup>2+</sup> from  
the aqueous solutions**

Majid Vafaezadeh,\* Mohammad Mahmoodi Hashemi and Nasim Ghavidel

Electronic Supplementary Information (ESI)

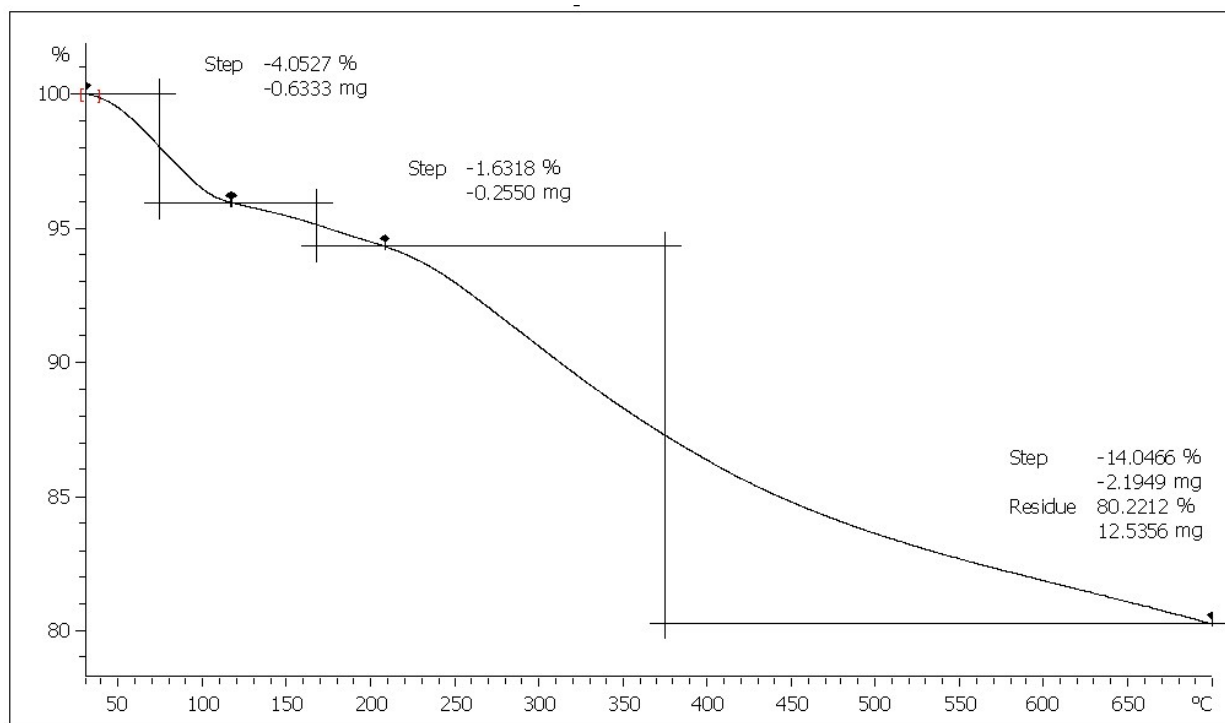

**Fig. S1.** TGA of **1**.

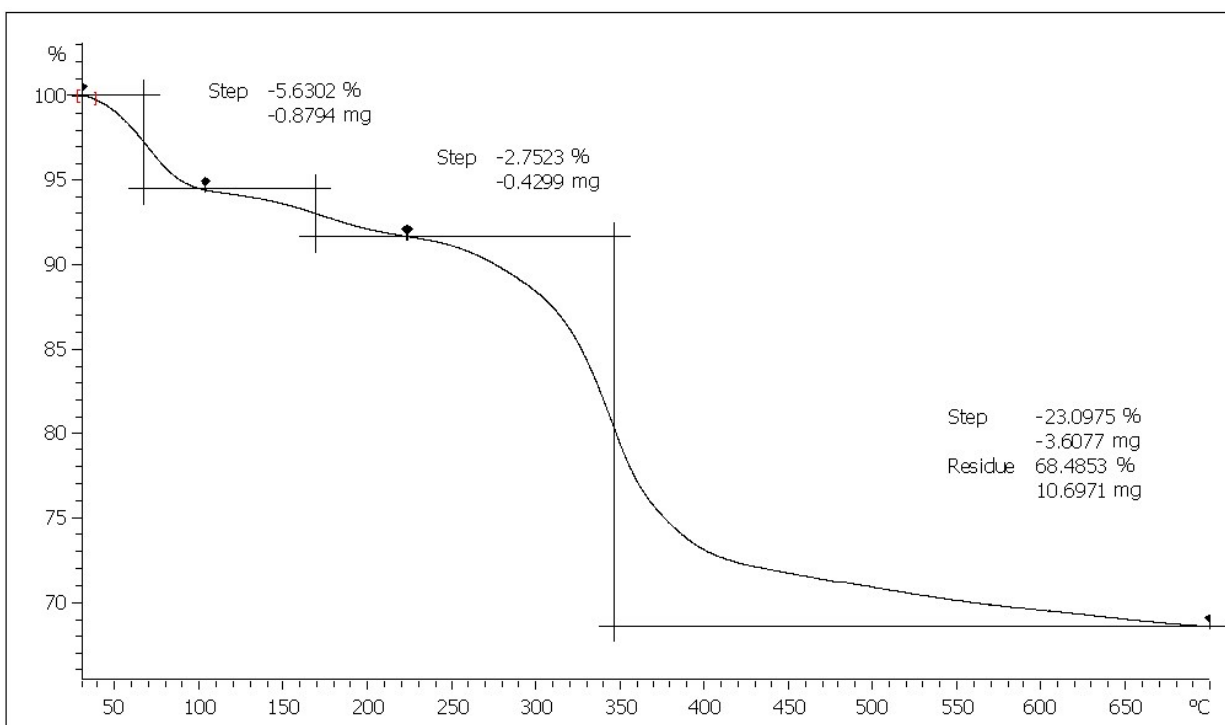

**Fig. S2.** TGA of **3**.
